# Supplementary material for: Induction of autophagy-dependent and caspase- and microtubule-acetylation-independent cell death by phytochemical-stabilized gold nanopolygons in colorectal adenocarcinoma cells
Source: Royal Society of Chemistry journal article supplement (doi:10.1039/d4nr00730a), 2024-01-01
Supplement: d4nr00730a1.pdf [file d4nr00730a1.pdf]

## Supplementary figure 1

**S1.A**

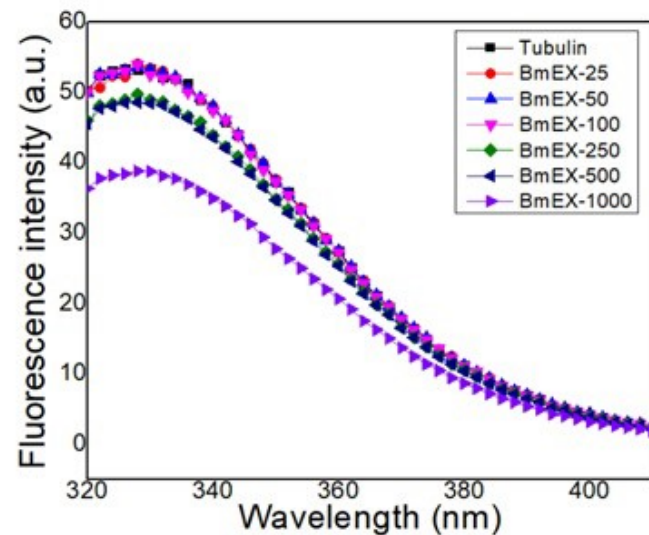

**S1.C**

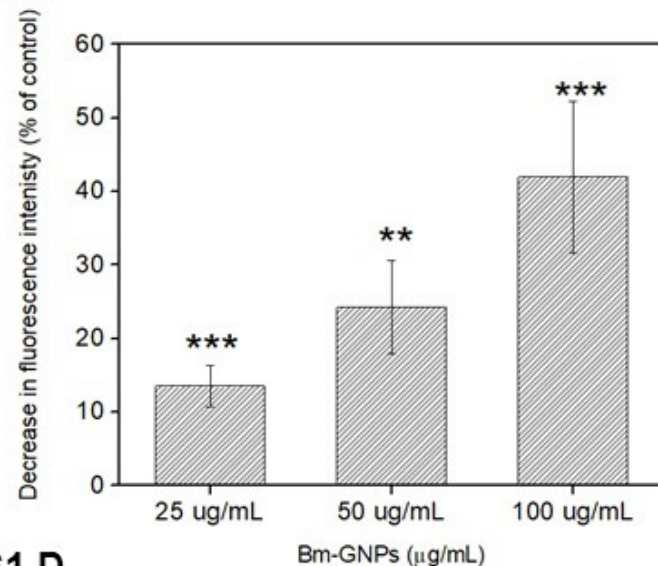

**S1.B**

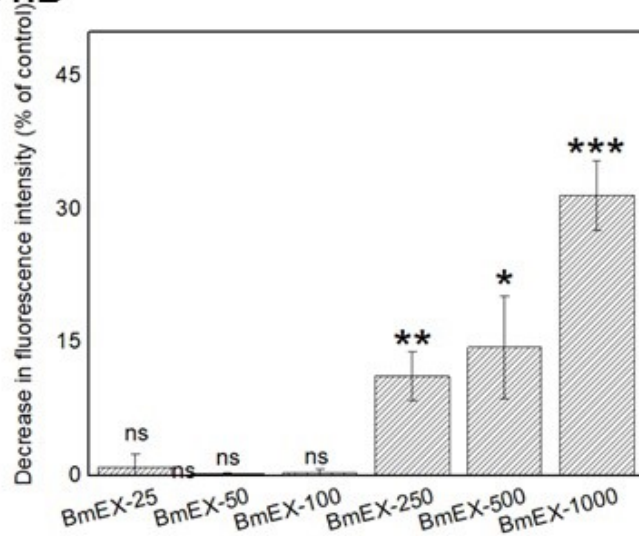

**S1.D**

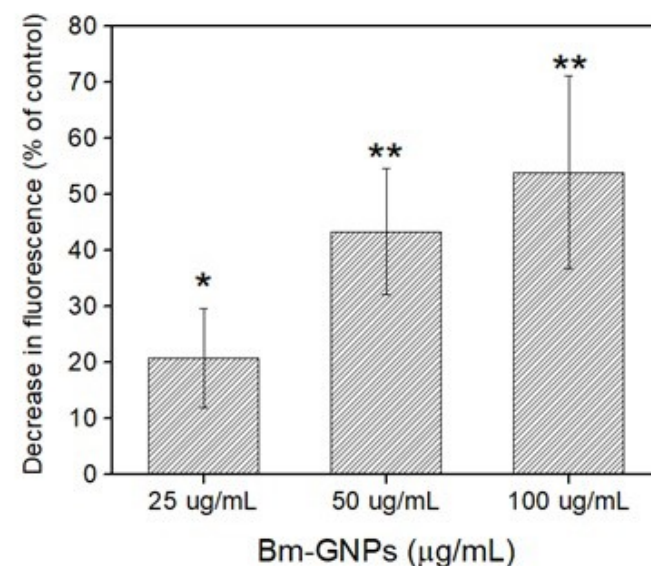

Figure S1: Interaction of Bm-GNPs with tubulin. (A) A fluorescence spectra indicating the quenching of tubulin tryptophan fluorescence in the presence of Bm-EX. (B) A bar graph indicating the percentage decrease in the tryptophan's fluorescence in the presence of BmEX. (C) A bar graph indicating the percentage decrease in the tryptophan's fluorescence in the presence of Bm-GNPs. (D) A bar graph indicating the percentage decrease in ANS-tubulin fluorescence in the presence of Bm-GNPs. (\*  $p<0.05$ ; \*\*  $p<0.01$ ; \*\*\*  $p<0.001$ ; ns: non-significant)
