# Supplementary material for: Induction of autophagy-dependent and caspase- and microtubule-acetylation-independent cell death by phytochemical-stabilized gold nanopolygons in colorectal adenocarcinoma cells
Source: Royal Society of Chemistry journal article supplement (doi:10.1039/d4nr00730a), 2024-01-01
Supplement: d4nr00730a2.pdf [file d4nr00730a2.pdf]

## Supplementary figure 2

### S2.A

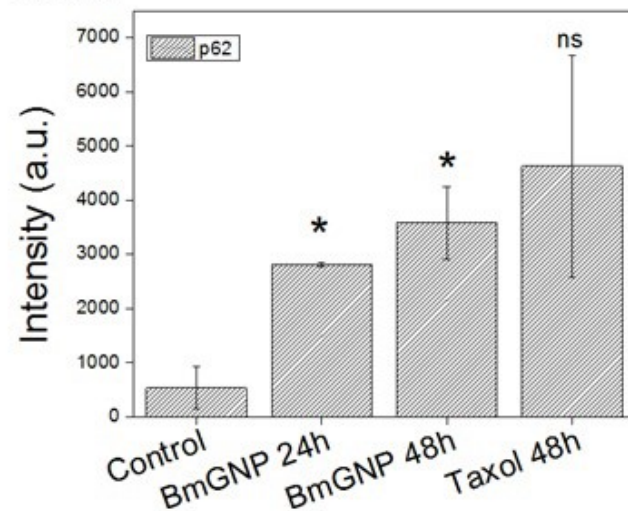

### S2.B

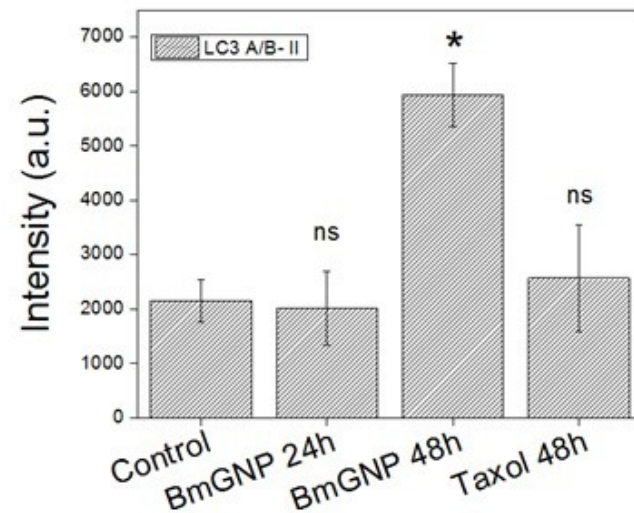

### S2.C

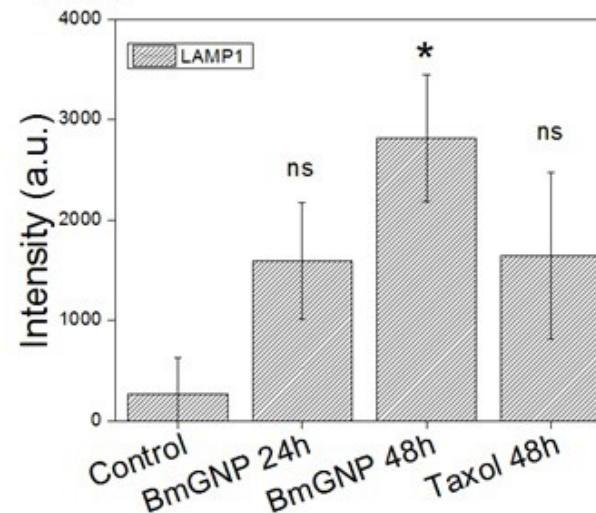

### S2.D

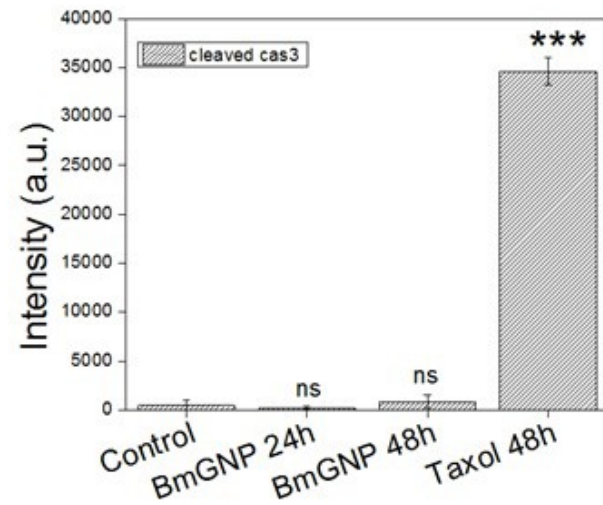

### S2.E

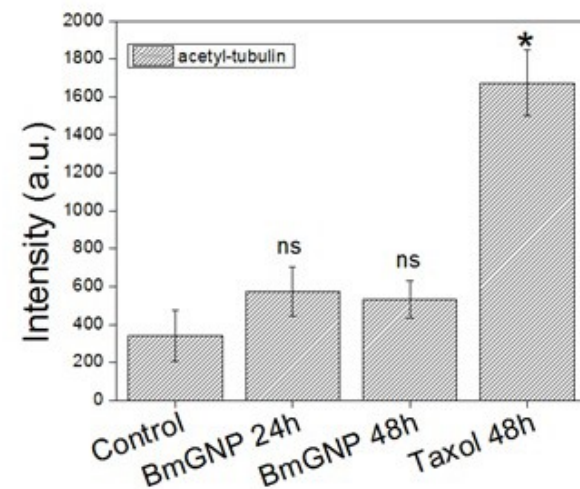

Figure S2. Quantitative estimation of expression of different proteins using Western blot. A bar graph indicating the band intensities of the protein p62 (A), LC3 A/B-II (B), LAMP-1 (C), cleaved caspase 3 (D) and acetyl-tubulin (E) under different conditions. (\*  $p < 0.05$ ; \*\*  $p < 0.01$ ; \*\*\*  $p < 0.001$ ; ns: non-significant)
